# Supplementary material for: PPARδ Inhibits Hyperglycemia-Triggered Senescence of Retinal Pigment Epithelial Cells by Upregulating SIRT1
Source: MDPI journal article supplement (doi:10.3390/antiox11061207), 2022-06-20
Supplement: s1 [file s1]

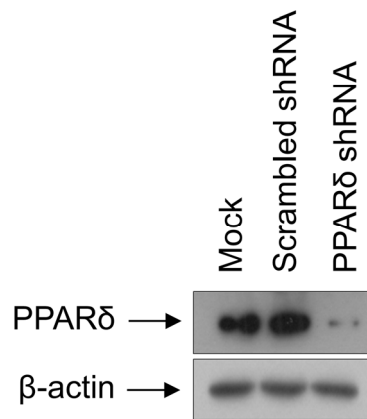

**Supplementary Figure. S1.** Effect of shRNA on expression of PPAR $\delta$ . Cells were transduced with lentiviral particles expressing scrambled or PPAR $\delta$ -targeting shRNA. Cells stably expressing shRNA were selected by culture in the presence of puromycin (2  $\mu$ g/mL) for 8 days. Silencing of PPAR $\delta$  was verified by Western blot analysis.
